# Supplementary material
Source: PubMed Central journal article supplement (PMC5033851)
Supplement: jciinsight-1-88245-s001.pdf [file jciinsight-1-88245-s001.pdf]

## Supplementary Figure 1

**A.**

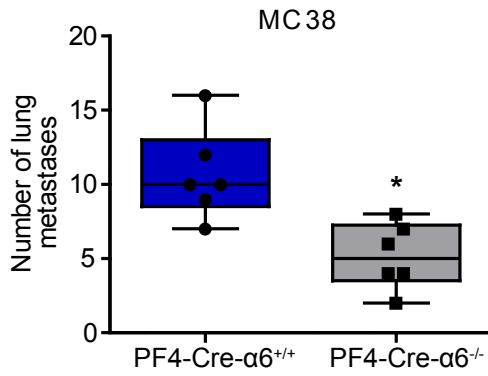

**B.**

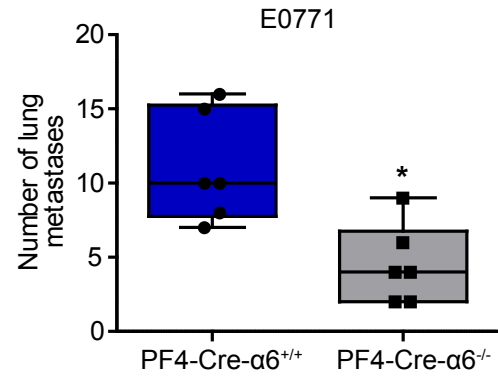

**Supplementary Figure 1. Genetic deficiency of platelet integrin  $\alpha 6\beta 1$  reduced experimental metastasis induced by MC38 and E0771 tumor cells.** Numbers of metastatic foci in lung tissues of (A) MC38-injected or (B) E0771-injected PF4-Cre- $\alpha 6^{+/+}$  and PF4-Cre- $\alpha 6^{-/-}$  mice, \* $p < 0.05$ , Mann-Whitney test. Each point represents an individual mouse. Box-and-whisker plots were used to graphically represent the median (line within box), upper- and lower- quartile (bounds of box), and maximum and minimum values (bars).

## Supplementary Figure 2

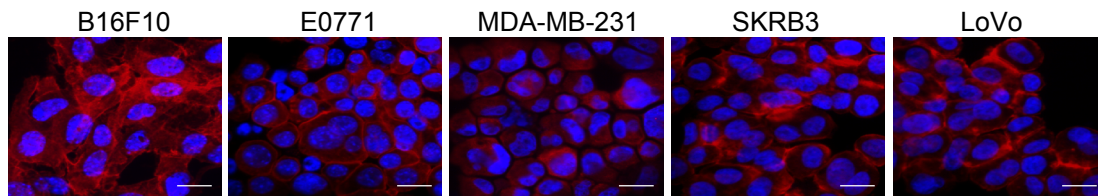

**Supplementary Figure 2. B16F10, E0771, MDA-MB-231, SKRB-3 and LoVo cells express ADAM9.** Representative immunofluorescence images of B16F10, E0771, MDA-MB-231, SKRB-3 and LoVo cells stained with an anti-ADAM9 antibody (IF: in red). Nuclei were stained with DAPI (blue). Scale bar: 20  $\mu$ m.

### Supplementary Figure 3

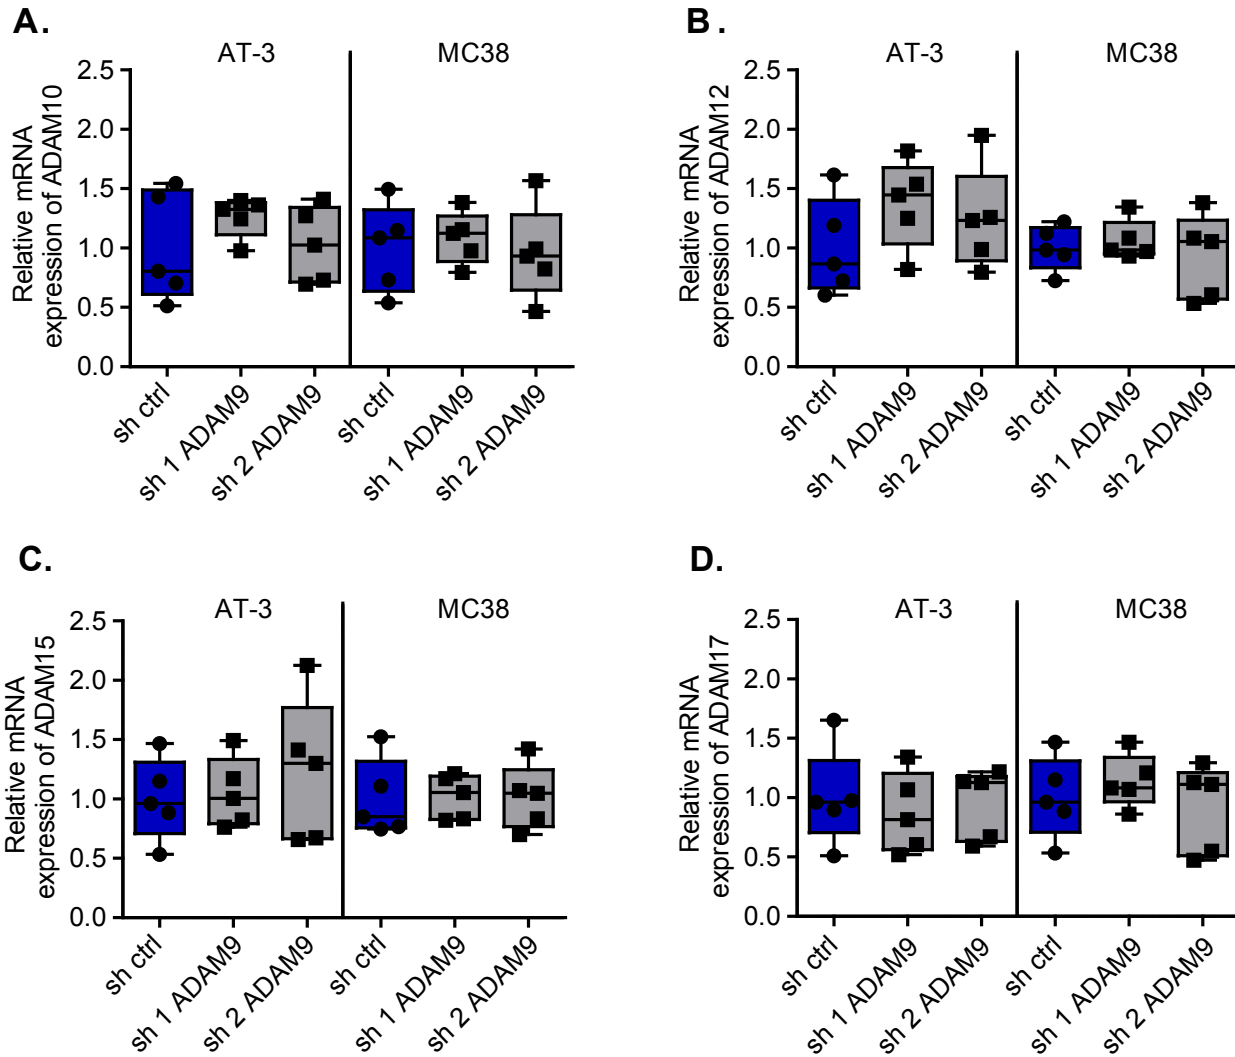

**Supplementary Figure 3. ADAM gene expression in ADAM9 knock-down AT-3 and MC38 cells.** Quantification of (A) ADAM10, (B) ADAM12, (C) ADAM15 and (D) ADAM17 gene expression in ADAM9 silenced AT-3 and MC38 cells by qRT-PCR. Data shown are representative of five independent experiments. Box-and-whisker plots were used to graphically represent the median (line within box), upper- and lower- quartile (bounds of box), and maximum and minimum values (bars)

## Supplementary Figure 4

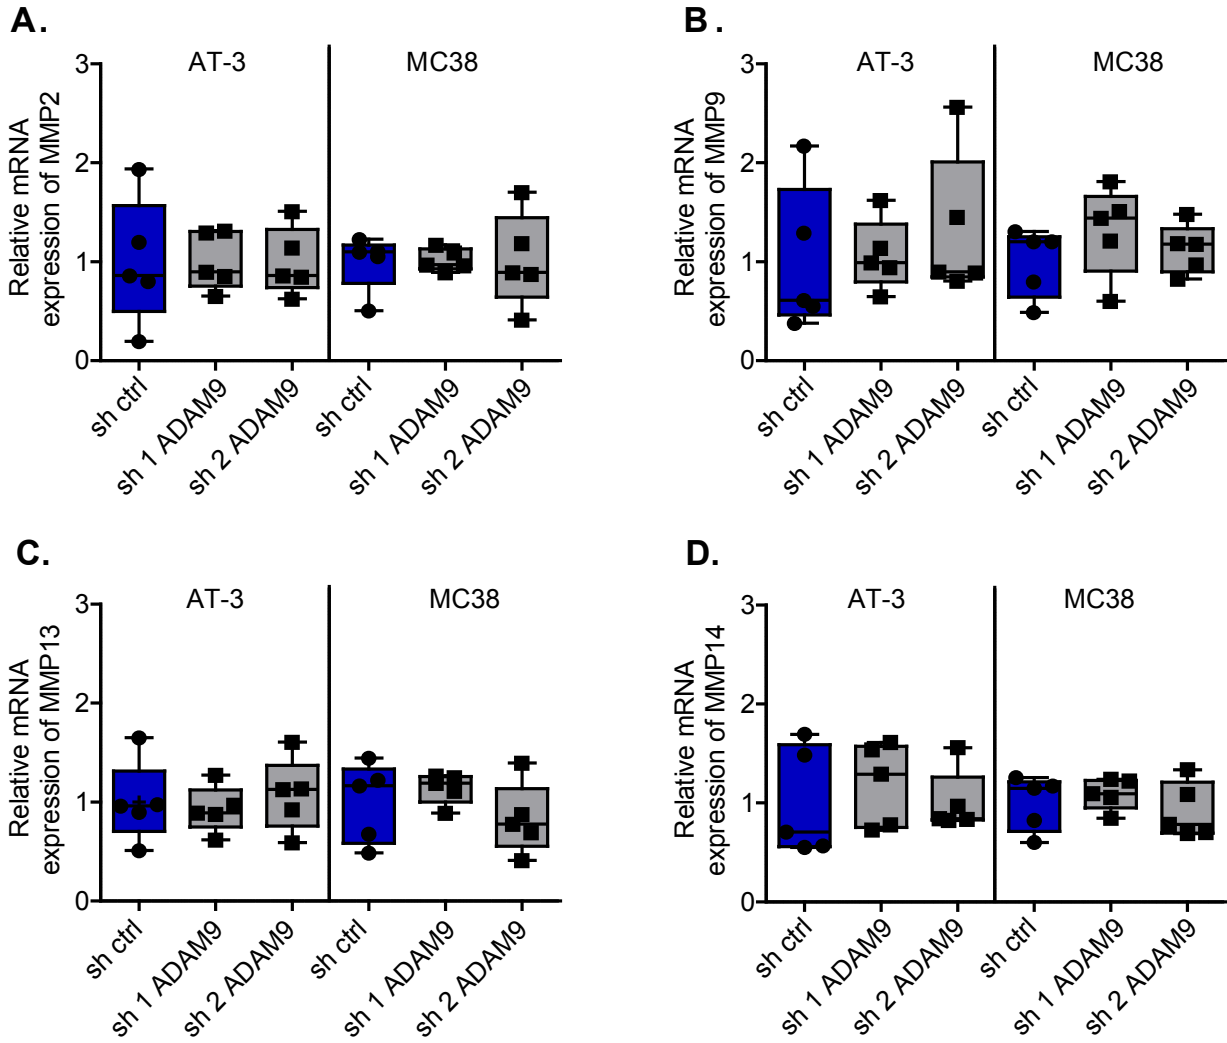

**Supplementary Figure 4. MMP gene expression in ADAM9 knock-down AT-3 and MC38 cells.** Quantification of (A) MMP2, (B) MMP9, (C) MMP13 and (D) MMP14 gene expression in ADAM9 silenced AT-3 and MC38 cells by qRT-PCR. Data shown are representative of five independent experiments. Box-and-whisker plots were used to graphically represent the median (line within box), upper- and lower- quartile (bounds of box), and maximum and minimum values (bars).

## Supplementary Figure 5

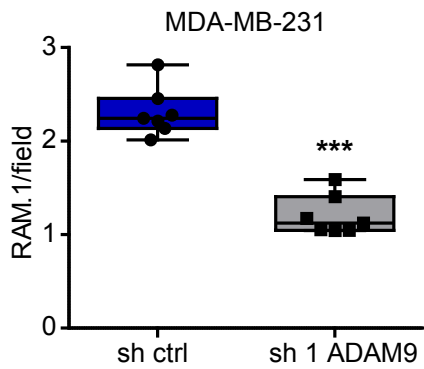

**Supplementary Figure 5. Silencing of ADAM9 expression attenuates platelet-tumor cell interaction.** Quantification of human platelets adhered to MDA-MB-231 control and ADAM9-silenced (sh1) cancer cells. MDA-MB-231 sh control and MDA-MB-231 sh1. \* $p < 0.05$ , Mann-Whitney test. Each point represents platelet adhesion obtained for one healthy donor. Box-and-whisker plots were used to graphically represent the median (line within box), upper- and lower- quartile (bounds of box), and maximum and minimum values (bars).

## Supplementary Figure 6

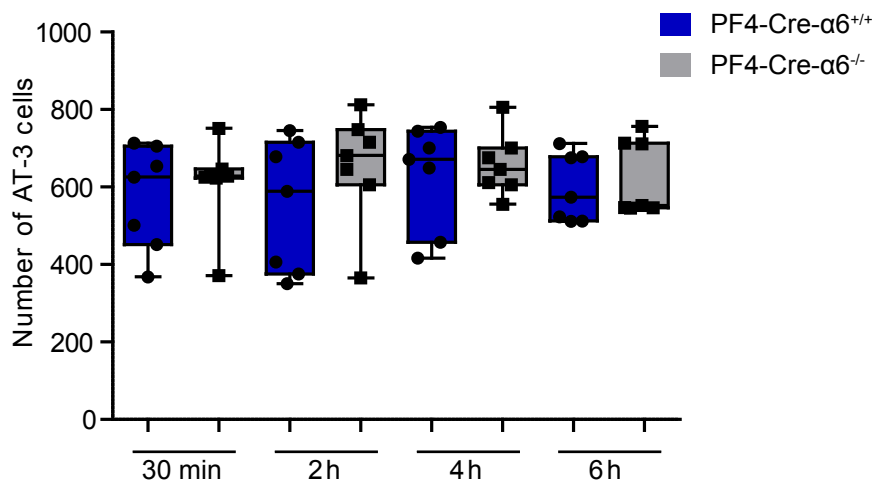

**Supplementary Figure 6. Effect of platelet integrin  $\alpha 6\beta 1$  on tumor cell engraftment in the lungs.** PF4-Cre- $\alpha 6^{+/+}$  and PF4-Cre- $\alpha 6^{-/-}$  mice were injected with CFSE-labelled AT-3 tumor cells. After 30 min, 2h, 4h and 6h, the lungs were isolated and the number of resident tumor cells was determined using fluorescent microscopy. Each point represents an individual mouse. Box-and-whisker plots were used to graphically represent the median (line within box), upper- and lower- quartile (bounds of box), and maximum and minimum values (bars).

## Supplementary Figure 7

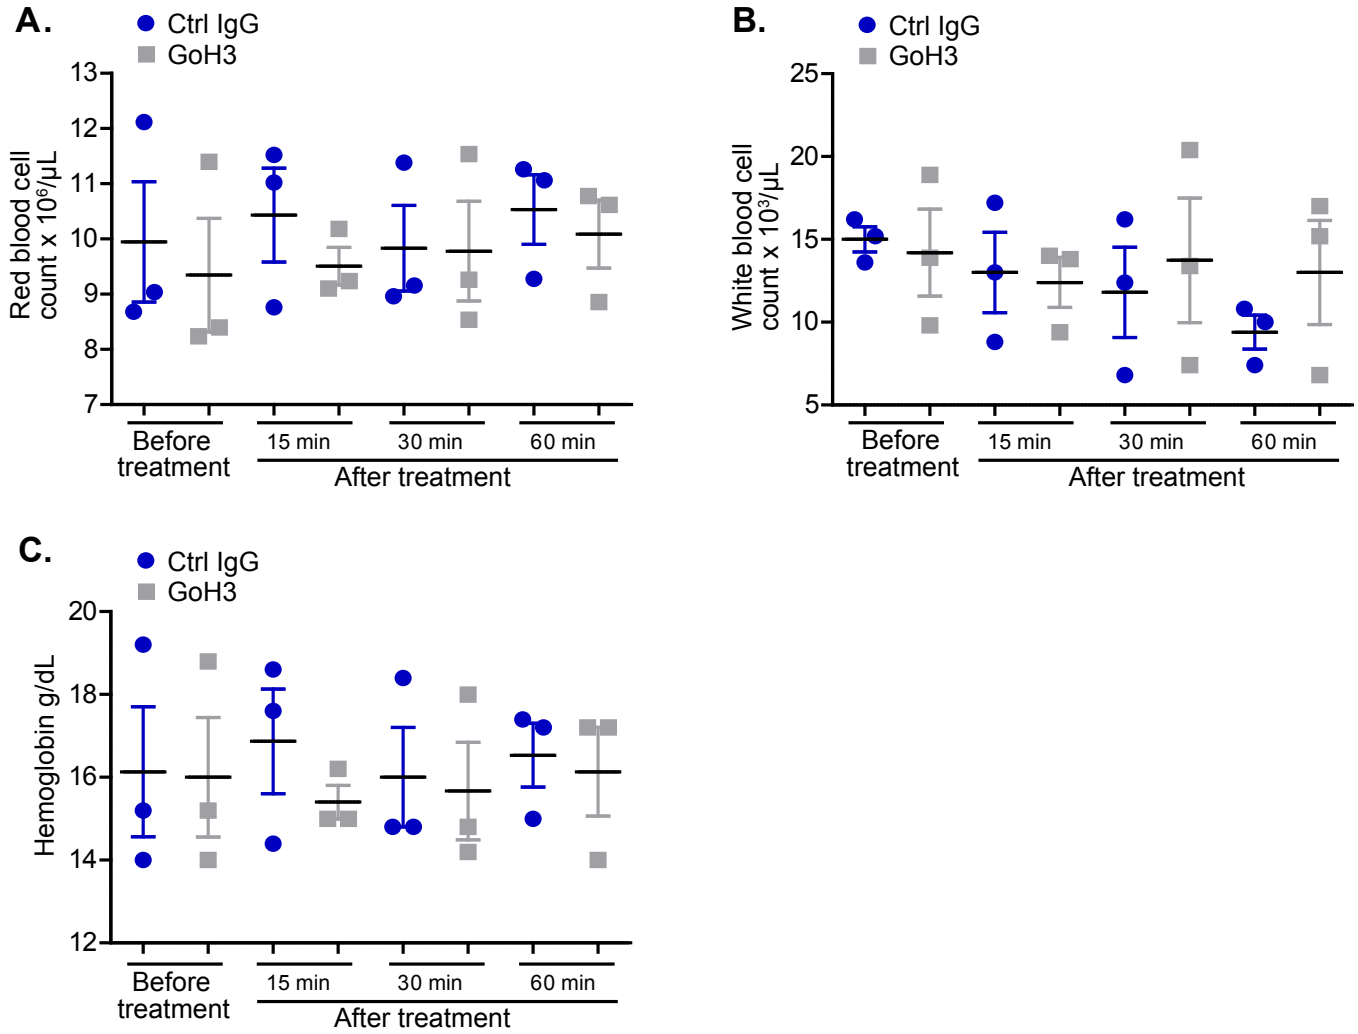

**Supplementary Figure 7. Effect of the GoH3, an  $\alpha 6$  blocking antibody on the blood count.** C57BL/6 mice were injected with 2 mg/kg of GoH3 or irrelevant control IgG and 15, 30 and 60 min later the level of (A) circulating red blood cells, (B) white blood cells and (C) hemoglobin content were determined. Each point represents an individual mouse. Horizontal black bars denote the mean. Mean  $\pm$  SEM.

## Supplementary Table 1.

| <b>Name</b>     | <b>Sequence 5'-3' Forward</b> | <b>Sequence 3'-5' Reverse</b> |
|-----------------|-------------------------------|-------------------------------|
| <b>m MMP2</b>   | AAGGATGGACTCCTGGCACATGCCTTT   | ACCTGTGGGCTTGTACACGTGGTGT     |
| <b>m MMP9</b>   | GCTGCCATTTCTAATAAAGA          | GCACTTCCTTTCACAAAG            |
| <b>m MMP13</b>  | TTTATTGTTGCTGCCATGA           | CTCTGGTGTGTTTGGGATGCT         |
| <b>m MMP14</b>  | CCCTAGGCCTGGAACATTCT          | TTTGGGCTTATCTGGGACAG          |
| <b>h ADAM9</b>  | CTTGCTGCGAAGGAAGTACCTG        | CACTCACTGGTTTTTCCTCGGC        |
| <b>m ADAM9</b>  | GAAGGCACCAAATGTGATGCTGG       | CCAGCCGTCTTCACAGTGACAA        |
| <b>m ADAM10</b> | AGCAACATCTGGGGACAA            | AAAGTTGGGCTTGGGATC            |
| <b>m ADAM12</b> | CCTTAAGATGACCAAGTA            | CATTCAGACAGCCCCCTT            |
| <b>m ADAM15</b> | ACAAGCATCTTAGGCGTTG           | TTGACAACAGGGTCCATCA           |
| <b>m ADAM17</b> | TGAGCGATTTTGGGATTC            | GTCCTTCTCAAARCCGTCA           |
| <b>GAPDH</b>    | CATCACTGCCACCCAGAAGACTG       | ATGCCAGTGAGCTTCCCGTTCAG       |

**Supplementary Table 1.** List of primer sequences
